# Supplementary material
Source: PubMed Central journal article supplement (PMC7305177)
Supplement: 41396_2020_660_MOESM1_ESM.pdf [file 41396_2020_660_MOESM1_ESM.pdf]

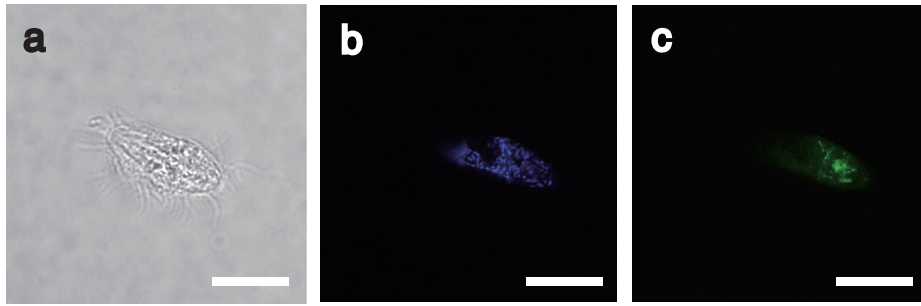

1 **Supplementary Figure S1.** Microscopic observations of *Cyclidium* sp. YH. a: Bright field. b: DAPI image.  
2 c: Fluorescent micrograph after hybridization with archaea-specific probe (Arc915) for the endosymbiotic  
3 methanogen of *Cyclidium* sp. YH. The scale bar represents 10  $\mu$ m.

4

5

6
