# Supplementary material
Source: PubMed Central journal article supplement (PMC7305177)
Supplement: 41396_2020_660_MOESM2_ESM.pdf [file 41396_2020_660_MOESM2_ESM.pdf]

**A)** Required cell numbers for protist growth =  $\frac{\text{Bacterial number that consumed by protist}}{\text{Increased of protist number}}$

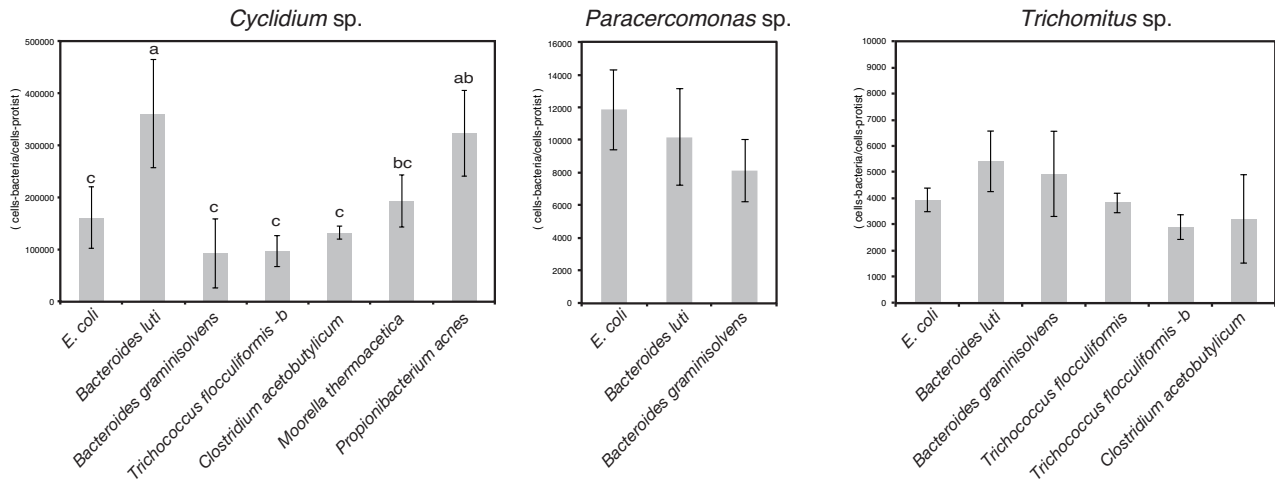

**B)** Required cell volumes for protist growth =  $\frac{\text{Bacterial number that consumed by protist}}{\text{Increased of protist number}} \times \text{Each bacteria cell volume}$

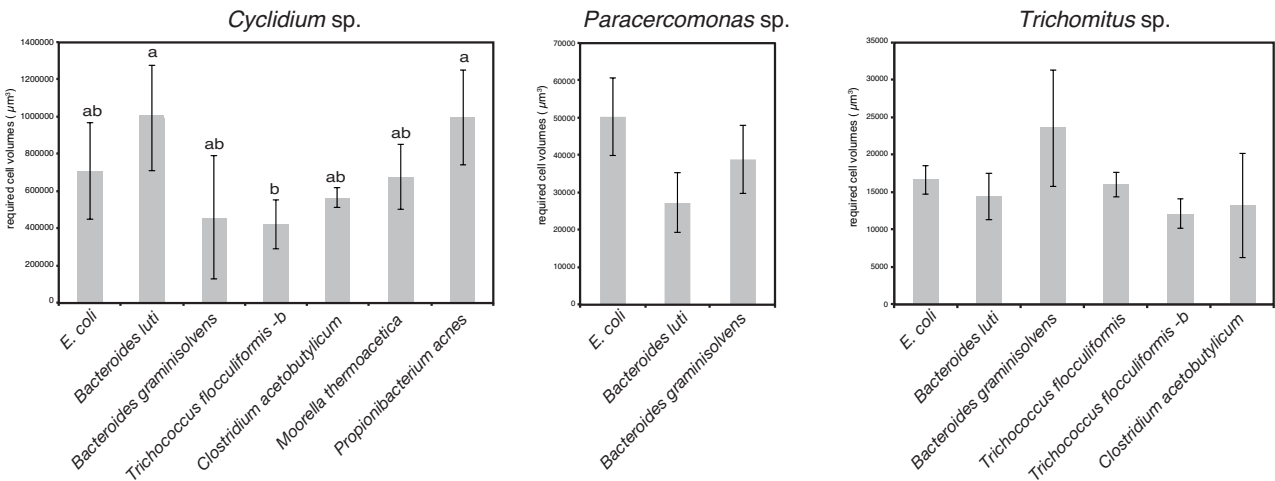

1 **Supplementary Figure S2.** Required cell number (A) and volume (B) for each protists growth estimated  
 2 from increased of each protist number and decreased of food bacteria cell number during exponential growth  
 3 phase, and food bacterial size such as wide, long, and diameter. Different letters indicate significantly  
 4 different values (P < 0.05) by one-way ANOVA analysis.
