# Supplementary material
Source: PubMed Central journal article supplement (PMC7305177)
Supplement: 41396_2020_660_MOESM3_ESM.pdf [file 41396_2020_660_MOESM3_ESM.pdf]

**Supplementary Table S1.** Characteristics of food bacteria and archaea.

| Species                               | Phylum               | Gram-staining properties | Cell shape  | Average cell size ( $\mu\text{m}$ wide and long)          |
|---------------------------------------|----------------------|--------------------------|-------------|-----------------------------------------------------------|
| <i>Escherichia coli</i>               | Proteobacteria       | negative                 | rod         | 1.0 - 3.0                                                 |
| <i>Bacteroides luti</i>               | Bacteroidetes        | negative                 | rod         | 0.5 - 1.4                                                 |
| <i>Bacteroides graminisolvens</i>     | Bacteroidetes        | negative                 | rod         | 0.5 - 2.9                                                 |
| <i>Propionibacterium acnes</i>        | Actinobacteria       | positive                 | rod         | 0.4 - 4.0                                                 |
| <i>Moorella thermoacetica</i>         | Firmcutes            | positive                 | rod         | 0.4 - 2.8                                                 |
| <i>Clostridium acetobutylicum</i>     | Firmcutes            | positive                 | rod         | 1.0 - 3.7                                                 |
| <i>Trichococcus flocculiformis</i>    | Firmcutes            | positive                 | filamentous | chains of coccoid cells (twenty to several hundred cells) |
| <i>Trichococcus flocculiformis -b</i> | Firmcutes            | positive                 | coccus      | 2.3                                                       |
| <i>Methanospirillum hungatei</i>      | <i>Euryarchaeota</i> | negative                 | curved rods | 0.5 and 7.0 (form long chains of cells)                   |
| <i>Methanobacterium beijingense</i>   | <i>Euryarchaeota</i> | negative                 | rod         | 0.5 - 5.0                                                 |
