# Supplementary material
Source: PubMed Central journal article supplement (PMC7305177)
Supplement: 41396_2020_660_MOESM4_ESM.pdf [file 41396_2020_660_MOESM4_ESM.pdf]

**Supplementary Table S2.** Maximum ingestion rates under high prey concentration ( $10^7$  cells  $\text{mL}^{-1}$ ) and cell volume ( $\mu\text{m}^3$ ) of protists.

| species                               | Culture condition | group      | Cell volume<br>( $\mu\text{m}^3$ ) | Ingestion rate<br>(cells of bacteria protist $^{-1}$ h $^{-1}$ ) | Ref                     |
|---------------------------------------|-------------------|------------|------------------------------------|------------------------------------------------------------------|-------------------------|
| <i>Cyclidium</i> sp. YH               | anaerobic         | Ciliate    | $7.37 \times 10^2$ <sup>a</sup>    | $2.00 \times 10^3$                                               | this study              |
| <i>Trichomitus</i> sp. YH             | anaerobic         | Flagellate | $2.68 \times 10^2$ <sup>b</sup>    | $0.52 \times 10^2$                                               |                         |
| <i>Paracercomonas</i> sp. YH          | anaerobic         | Flagellate | $0.65 \times 10^2$ <sup>b</sup>    | $1.33 \times 10^2$                                               |                         |
| <i>Metopus es</i>                     | anaerobic         | Ciliate    | $2.54 \times 10^5$ <sup>a</sup>    | $4.18 \times 10^3$                                               | Massana et al., 1994    |
| <i>Plagiophyla nasuta</i>             | anaerobic         | Ciliate    | $1.05 \times 10^5$ <sup>a</sup>    | $4.30 \times 10^3$                                               |                         |
| <i>Suigetsumonas clinomigrationis</i> | anaerobic         | Flagellate | $0.27 \times 10^2$ <sup>a</sup>    | 1.8                                                              | Kondo and Okamura. 2017 |
| <i>Suigetsumonas linomigrationis</i>  | aerobic           | Flagellate | $0.27 \times 10^2$ <sup>a</sup>    | 6.4                                                              |                         |
| <i>Ochromonas</i> sp.                 | aerobic           | Flagellate | $2.99 \times 10^2$ <sup>b</sup>    | $0.78 \times 10^2$                                               | Pfandl et al., 2004     |
| <i>Spumella</i> sp.                   | aerobic           | Flagellate | $0.65 \times 10^2$ <sup>b</sup>    | $0.29 \times 10^2$                                               |                         |
| <i>Bodo designis</i>                  | aerobic           | Flagellate | $1.17 \times 10^2$ <sup>a</sup>    | 9.1                                                              | Artolozaga et al., 2002 |
| <i>Jakoba libera</i>                  | aerobic           | Flagellate | $0.65 \times 10^2$ <sup>b</sup>    | $0.30 \times 10^2$                                               |                         |
| <i>Rhynchomonas nasuta</i>            | aerobic           | Flagellate | $0.33 \times 10^2$ <sup>b</sup>    | $0.10 \times 10^2$                                               |                         |
| <i>Euplotes vannus</i>                | aerobic           | Ciliate    | $1.70 \times 10^5$ <sup>a</sup>    | $1.20 \times 10^4$                                               | Tuorto and Taghon, 2014 |
| <i>Euplotes plicatum</i>              | aerobic           | Ciliate    | $2.73 \times 10^4$ <sup>a</sup>    | $1.94 \times 10^4$                                               |                         |
| <i>Uronema marinum</i>                | aerobic           | Ciliate    | $1.36 \times 10^3$ <sup>a</sup>    | $3.46 \times 10^3$                                               |                         |
| <i>Tetrahymena</i> sp.                | aerobic           | Ciliate    | $7.96 \times 10^3$ <sup>a</sup>    | $4.58 \times 10^3$                                               | Eisenmann et al., 1998  |
| <i>Halteria</i> sp.                   | aerobic           | Ciliate    | $1.95 \times 10^3$                 | $3.22 \times 10^3$                                               | S'imek et al., 2000     |
| <i>Euplotes mutabilis</i>             | aerobic           | Ciliate    | $1.88 \times 10^5$ <sup>a</sup>    | $1.60 \times 10^4$                                               | Zubkov and Sleigh, 1996 |
| <i>Stylonchia</i> sp.                 | aerobic           | Ciliate    | $1.35 \times 10^5$ <sup>a</sup>    | $1.21 \times 10^3$                                               | Hadas et al., 1998      |
| <i>Colpoda</i> sp.                    | aerobic           | Ciliate    | $2.85 \times 10^3$ <sup>a</sup>    | $9.30 \times 10^2$                                               |                         |

a, estimated as ellipsoid body from length and width of each cell; b, estimated as sphere body from diameter of each cell.

## References:

- Massana R, Stumm, CK, Pedrós-Alió C. (1994). Effects of temperature, sulfide, and food abundance on growth and feeding of anaerobic ciliates. *Appl Environ Microbiol* **60**: 1317-1324.
- Kondo R, Okamura T. (2017). Growth and grazing kinetics of the facultative anaerobic nanoflagellate, *Suigetsumonas clinomigrationis*. *Microbes Environ* **32**: 80-83
- Pfandl K, Posch T, Boenigk J. (2004). Unexpected effects of prey dimensions and morphologies on the size selective feeding by two bacterivorous flagellates (*Ochromonas* sp. and *Spumella* sp.). *J Eukaryot Microbiol* **51**: 626-633.
- Artolozaga I, Valcárcel M, Ayo B, Latatu A, Iriberry J. (2002). Grazing rates of bacterivorous protists inhabiting diverse marine planktonic microenvironments. *Limnol Oceanogr* **47**: 142-150.
- Tuorto SJ, Taghon GL. (2014). Rates of benthic bacterivory of marine ciliates as a function of prey concentration. *J Exp Mar Biol Ecol* **460**: 129-134.
- Eisenmann H, Harms H, Meckenstock R, Meyer EI, Zehnder AJ. (1998). Grazing of a *Tetrahymena* sp. on adhered bacteria in percolated columns monitored by in situ hybridization with fluorescent oligonucleotide probes. *Appl Environ Microbiol* **64**: 1264-1269.
- Šimek K, Jürgens K, Nedoma J, Comerma M, Armengol J. (2000). Ecological role and bacterial grazing of *Halteria* spp.: small freshwater oligotrichs as dominant pelagic ciliate bacterivores. *Aquat Microb Ecol* **22**: 43-56.
- Zubkov MV, Sleigh MA. (1996). Bacterivory by the ciliate *Euplotes* in different states of hunger. *FEMS Microbiol Ecol* **20**: 137-147.
- Hadas O, Malinsky-Rushansky N, Pinkas R, Cappenberg TE. (1998). Grazing on autotrophic and heterotrophic picoplankton by ciliates isolated from Lake Kinneret, Israel. *J Plankton Res* **20**: 1435-1448.
